# Supplementary material for: Exploring the extremes: applying high concentration of yeast extract leads to drastic morphological changes and elimination of (+)-geodin and asterric acid production in Aspergillus terreus submerged cultures
Source: PubMed Central journal article supplement (PMC7796888; doi:10.1007/s10529-020-03018-5), 2020-10-07
Supplement: 10529_2020_3018_MOESM1_ESM.pdf [file 10529_2020_3018_MOESM1_ESM.pdf]

## **Supplementary material**

### **Biotechnology Letters**

**“Exploring the extremes: Applying high concentration of yeast extract leads to drastic morphological changes and elimination of (+)-geodin and asterric acid production in *Aspergillus terreus* submerged cultures”**

Tomasz Boruta<sup>\*</sup>, Adrianna Górnicka, Iwona Grzybowska, Ida Stefaniak, Marcin Bizukoje

Lodz University of Technology, Faculty of Process and Environmental Engineering, Department of Bioprocess Engineering, ul. Wolczanska 213, 90-924 Lodz, Poland

<sup>\*</sup> Corresponding author. Phone: +48 42 631 39 77; fax: +48 42 636 56 63.

E-mail address: tomasz.boruta@p.lodz.pl

**Supplementary Table 1:** Results of two-sample t-test (significance level  $\alpha = .05$ ) performed to evaluate, whether the mean results of projected area (reported in fig. 3a) obtained for the standard cultivation medium (containing 20 g l<sup>-1</sup> of lactose and 2 g l<sup>-1</sup> of yeast extract) differed significantly from the mean values recorded for other tested media at a given time of the process (LAC, lactose; YR, yeast extract; NS, not significant)

| Cultivation time [h] | <i>P</i> values recorded for the tested growth media |                                                   |                                                     |                                                      |                                                     |                                                      |
|----------------------|------------------------------------------------------|---------------------------------------------------|-----------------------------------------------------|------------------------------------------------------|-----------------------------------------------------|------------------------------------------------------|
|                      | LAC 0.2 g l <sup>-1</sup><br>YE 2 g l <sup>-1</sup>  | LAC 2 g l <sup>-1</sup><br>YE 2 g l <sup>-1</sup> | LAC 200 g l <sup>-1</sup><br>YE 2 g l <sup>-1</sup> | LAC 20 g l <sup>-1</sup><br>YE 0.2 g l <sup>-1</sup> | LAC 20 g l <sup>-1</sup><br>YE 20 g l <sup>-1</sup> | LAC 20 g l <sup>-1</sup><br>YE 200 g l <sup>-1</sup> |
| 24                   | NS*                                                  | NS*                                               | <.001                                               | <.001                                                | <.001                                               | <.001                                                |
| 48                   | <.001                                                | <.001                                             | <.001                                               | <.001                                                | <.001                                               | <.001                                                |
| 72                   | <.001                                                | <.001                                             | <.001                                               | <.001                                                | <.001                                               | <.001                                                |
| 96                   | <.001                                                | <.001                                             | <.001                                               | <.001                                                | <.001                                               | <.001                                                |
| 120                  | <.001                                                | NS*                                               | <.001                                               | <.001                                                | <.001                                               | <.001                                                |
| 144                  | <.001                                                | NS*                                               | <.001                                               | <.001                                                | <.001                                               | <.001                                                |
| 168                  | <.001                                                | NS*                                               | <.001                                               | <.001                                                | <.001                                               | <.001                                                |

\**P* >.05

**Supplementary Table 2:** Results of two-sample t-test (significance level  $\alpha = .05$ ) performed to evaluate, whether the mean results of elongation (reported in fig. 3b) obtained for the standard cultivation medium (containing 20 g l<sup>-1</sup> of lactose and 2 g l<sup>-1</sup> of yeast extract) differed significantly from the mean values recorded for other tested media at a given time of the process (LAC, lactose; YR, yeast extract; NS, not significant)

| Cultivation time [h] | <i>P</i> values recorded for the tested growth media |                                                   |                                                     |                                                      |                                                     |                                                      |
|----------------------|------------------------------------------------------|---------------------------------------------------|-----------------------------------------------------|------------------------------------------------------|-----------------------------------------------------|------------------------------------------------------|
|                      | LAC 0.2 g l <sup>-1</sup><br>YE 2 g l <sup>-1</sup>  | LAC 2 g l <sup>-1</sup><br>YE 2 g l <sup>-1</sup> | LAC 200 g l <sup>-1</sup><br>YE 2 g l <sup>-1</sup> | LAC 20 g l <sup>-1</sup><br>YE 0.2 g l <sup>-1</sup> | LAC 20 g l <sup>-1</sup><br>YE 20 g l <sup>-1</sup> | LAC 20 g l <sup>-1</sup><br>YE 200 g l <sup>-1</sup> |
| 24                   | NS*                                                  | NS*                                               | NS*                                                 | <.001                                                | NS*                                                 | <.001                                                |
| 48                   | NS*                                                  | NS*                                               | NS*                                                 | <.001                                                | <.001                                               | <.001                                                |
| 72                   | NS*                                                  | NS*                                               | NS*                                                 | <.001                                                | NS*                                                 | <.001                                                |
| 96                   | .003                                                 | <.001                                             | NS*                                                 | <.001                                                | NS*                                                 | <.001                                                |
| 120                  | <.001                                                | <.001                                             | NS*                                                 | <.001                                                | .012                                                | <.001                                                |
| 144                  | <.001                                                | .007                                              | NS*                                                 | <.001                                                | .029                                                | <.001                                                |
| 168                  | .003                                                 | NS*                                               | <.001                                               | <.001                                                | <.001                                               | <.001                                                |

\**P* >.05

**Supplementary Table 3:** Results of two-sample t-test (significance level  $\alpha = .05$ ) performed to evaluate, whether the mean results of convexity (reported in fig. 3c) obtained for the standard cultivation medium (containing 20 g l<sup>-1</sup> of lactose and 2 g l<sup>-1</sup> of yeast extract) differed significantly from the mean values recorded for other tested media at a given time of the process (LAC, lactose; YR, yeast extract; NS, not significant)

| Cultivation time [h] | <i>P</i> values recorded for the tested growth media |                                                   |                                                     |                                                      |                                                     |                                                      |
|----------------------|------------------------------------------------------|---------------------------------------------------|-----------------------------------------------------|------------------------------------------------------|-----------------------------------------------------|------------------------------------------------------|
|                      | LAC 0.2 g l <sup>-1</sup><br>YE 2 g l <sup>-1</sup>  | LAC 2 g l <sup>-1</sup><br>YE 2 g l <sup>-1</sup> | LAC 200 g l <sup>-1</sup><br>YE 2 g l <sup>-1</sup> | LAC 20 g l <sup>-1</sup><br>YE 0.2 g l <sup>-1</sup> | LAC 20 g l <sup>-1</sup><br>YE 20 g l <sup>-1</sup> | LAC 20 g l <sup>-1</sup><br>YE 200 g l <sup>-1</sup> |
| 24                   | NS*                                                  | .002                                              | <.001                                               | <.001                                                | <.001                                               | <.001                                                |
| 48                   | <.001                                                | .023                                              | <.001                                               | <.001                                                | <.001                                               | <.001                                                |
| 72                   | NS*                                                  | <.001                                             | NS*                                                 | <.001                                                | <.001                                               | <.001                                                |
| 96                   | <.001                                                | NS*                                               | <.001                                               | <.001                                                | <.001                                               | <.001                                                |
| 120                  | <.001                                                | <.001                                             | <.001                                               | <.001                                                | <.001                                               | <.001                                                |
| 144                  | <.001                                                | <.001                                             | <.001                                               | <.001                                                | <.001                                               | <.001                                                |
| 168                  | <.001                                                | <.001                                             | .009                                                | <.001                                                | NS*                                                 | <.001                                                |

\**P* >.05

**Supplementary Table 4:** Results of two-sample t-test (significance level  $\alpha = .05$ ) performed to evaluate, whether the mean results of circularity (reported in fig. 3d) obtained for the standard cultivation medium (containing 20 g l<sup>-1</sup> of lactose and 2 g l<sup>-1</sup> of yeast extract) differed significantly from the mean values recorded for other tested media at a given time of the process (LAC, lactose; YR, yeast extract; NS, not significant)

| Cultivation time [h] | <i>P</i> values recorded for the tested growth media |                                                   |                                                     |                                                      |                                                     |                                                      |
|----------------------|------------------------------------------------------|---------------------------------------------------|-----------------------------------------------------|------------------------------------------------------|-----------------------------------------------------|------------------------------------------------------|
|                      | LAC 0.2 g l <sup>-1</sup><br>YE 2 g l <sup>-1</sup>  | LAC 2 g l <sup>-1</sup><br>YE 2 g l <sup>-1</sup> | LAC 200 g l <sup>-1</sup><br>YE 2 g l <sup>-1</sup> | LAC 20 g l <sup>-1</sup><br>YE 0.2 g l <sup>-1</sup> | LAC 20 g l <sup>-1</sup><br>YE 20 g l <sup>-1</sup> | LAC 20 g l <sup>-1</sup><br>YE 200 g l <sup>-1</sup> |
| 24                   | NS*                                                  | NS*                                               | <.001                                               | <.001                                                | <.001                                               | <.001                                                |
| 48                   | <.001                                                | NS*                                               | <.001                                               | <.001                                                | <.001                                               | NS*                                                  |
| 72                   | NS*                                                  | NS*                                               | NS*                                                 | <.001                                                | <.001                                               | <.001                                                |
| 96                   | <.001                                                | NS*                                               | <.001                                               | <.001                                                | <.001                                               | NS*                                                  |
| 120                  | NS*                                                  | .011                                              | NS*                                                 | .002                                                 | <.001                                               | NS*                                                  |
| 144                  | NS*                                                  | NS*                                               | .006                                                | NS*                                                  | .008                                                | NS*                                                  |
| 168                  | <.001                                                | <.001                                             | <.001                                               | <.001                                                | <.001                                               | <.001                                                |

\**P* >.05

**Supplementary Table 5:** Results of two-sample t-test (significance level  $\alpha = .05$ ) performed to evaluate, whether the mean results of lovastatin concentration (reported in fig. 5a) obtained for the standard cultivation medium (containing 20 g l<sup>-1</sup> of lactose and 2 g l<sup>-1</sup> of yeast extract) differed significantly from the mean values recorded for other tested media at a given time of the process (LAC, lactose; YR, yeast extract; NS, not significant)

| Cultivation time [h] | <i>P</i> values recorded for the tested growth media |                                                   |                                                     |                                                      |                                                     |                                                      |
|----------------------|------------------------------------------------------|---------------------------------------------------|-----------------------------------------------------|------------------------------------------------------|-----------------------------------------------------|------------------------------------------------------|
|                      | LAC 0.2 g l <sup>-1</sup><br>YE 2 g l <sup>-1</sup>  | LAC 2 g l <sup>-1</sup><br>YE 2 g l <sup>-1</sup> | LAC 200 g l <sup>-1</sup><br>YE 2 g l <sup>-1</sup> | LAC 20 g l <sup>-1</sup><br>YE 0.2 g l <sup>-1</sup> | LAC 20 g l <sup>-1</sup><br>YE 20 g l <sup>-1</sup> | LAC 20 g l <sup>-1</sup><br>YE 200 g l <sup>-1</sup> |
| 0                    | NS*                                                  | NS*                                               | NS*                                                 | NS*                                                  | NS*                                                 | NS*                                                  |
| 24                   | <.001                                                | .048                                              | .002                                                | <.001                                                | <.001                                               | <.001                                                |
| 48                   | <.001                                                | <.001                                             | <.001                                               | <.001                                                | <.001                                               | <.001                                                |
| 72                   | <.001                                                | <.001                                             | .002                                                | <.001                                                | <.001                                               | <.001                                                |
| 96                   | <.001                                                | <.001                                             | .009                                                | <.001                                                | <.001                                               | <.001                                                |
| 120                  | <.001                                                | <.001                                             | <.001                                               | <.001                                                | <.001                                               | <.001                                                |
| 144                  | <.001                                                | <.001                                             | .002                                                | <.001                                                | <.001                                               | <.001                                                |
| 168                  | <.001                                                | <.001                                             | .002                                                | <.001                                                | <.001                                               | <.001                                                |

\**P* >.05

**Supplementary Table 6:** Results of two-sample t-test (significance level  $\alpha = .05$ ) performed to evaluate, whether the mean results of (+)-geodin concentration (reported in fig. 5b) obtained for the standard cultivation medium (containing 20 g l<sup>-1</sup> of lactose and 2 g l<sup>-1</sup> of yeast extract) differed significantly from the mean values recorded for other tested media at a given time of the process (LAC, lactose; YR, yeast extract; NS, not significant)

| Cultivation time [h] | <i>P</i> values recorded for the tested growth media |                                                   |                                                     |                                                      |                                                     |                                                      |
|----------------------|------------------------------------------------------|---------------------------------------------------|-----------------------------------------------------|------------------------------------------------------|-----------------------------------------------------|------------------------------------------------------|
|                      | LAC 0.2 g l <sup>-1</sup><br>YE 2 g l <sup>-1</sup>  | LAC 2 g l <sup>-1</sup><br>YE 2 g l <sup>-1</sup> | LAC 200 g l <sup>-1</sup><br>YE 2 g l <sup>-1</sup> | LAC 20 g l <sup>-1</sup><br>YE 0.2 g l <sup>-1</sup> | LAC 20 g l <sup>-1</sup><br>YE 20 g l <sup>-1</sup> | LAC 20 g l <sup>-1</sup><br>YE 200 g l <sup>-1</sup> |
| 0                    | NS*                                                  | NS*                                               | NS*                                                 | NS*                                                  | NS*                                                 | NS*                                                  |
| 24                   | NS*                                                  | NS*                                               | NS*                                                 | NS*                                                  | NS*                                                 | NS*                                                  |
| 48                   | NS*                                                  | NS*                                               | NS*                                                 | NS*                                                  | NS*                                                 | NS*                                                  |
| 72                   | NS*                                                  | NS*                                               | NS*                                                 | NS*                                                  | NS*                                                 | NS*                                                  |
| 96                   | NS*                                                  | NS*                                               | NS*                                                 | NS*                                                  | NS*                                                 | NS*                                                  |
| 120                  | NS*                                                  | NS*                                               | NS*                                                 | NS*                                                  | NS*                                                 | NS*                                                  |
| 144                  | <.001                                                | <.001                                             | .003                                                | <.001                                                | <.001                                               | <.001                                                |
| 168                  | .007                                                 | .007                                              | .008                                                | .012                                                 | .007                                                | .007                                                 |

\**P* >.05

**Supplementary Table 7:** Results of two-sample t-test (significance level  $\alpha = .05$ ) performed to evaluate, whether the mean results of butyrolactone I concentration (reported in fig. 5c) obtained for the standard cultivation medium (containing 20 g l<sup>-1</sup> of lactose and 2 g l<sup>-1</sup> of yeast extract) differed significantly from the mean values recorded for other tested media at a given time of the process (LAC, lactose; YR, yeast extract; NS, not significant)

| Cultivation time [h] | <i>P</i> values recorded for the tested growth media |                                                   |                                                     |                                                      |                                                     |                                                      |
|----------------------|------------------------------------------------------|---------------------------------------------------|-----------------------------------------------------|------------------------------------------------------|-----------------------------------------------------|------------------------------------------------------|
|                      | LAC 0.2 g l <sup>-1</sup><br>YE 2 g l <sup>-1</sup>  | LAC 2 g l <sup>-1</sup><br>YE 2 g l <sup>-1</sup> | LAC 200 g l <sup>-1</sup><br>YE 2 g l <sup>-1</sup> | LAC 20 g l <sup>-1</sup><br>YE 0.2 g l <sup>-1</sup> | LAC 20 g l <sup>-1</sup><br>YE 20 g l <sup>-1</sup> | LAC 20 g l <sup>-1</sup><br>YE 200 g l <sup>-1</sup> |
| 0                    | NS*                                                  | NS*                                               | NS*                                                 | NS*                                                  | NS*                                                 | NS*                                                  |
| 24                   | NS*                                                  | NS*                                               | NS*                                                 | NS*                                                  | NS*                                                 | NS*                                                  |
| 48                   | .031                                                 | .032                                              | <.001                                               | <.001                                                | .016                                                | <.001                                                |
| 72                   | .030                                                 | <.001                                             | <.001                                               | <.001                                                | NS*                                                 | <.001                                                |
| 96                   | NS*                                                  | .003                                              | .007                                                | .007                                                 | ns                                                  | .007                                                 |
| 120                  | .024                                                 | .002                                              | <.001                                               | <.001                                                | ns                                                  | .002                                                 |
| 144                  | .009                                                 | <.001                                             | .003                                                | .003                                                 | ns                                                  | NS*                                                  |
| 168                  | .024                                                 | .005                                              | .010                                                | .010                                                 | ns                                                  | .018                                                 |

\**P* >.05

**Supplementary Table 8:** Results of two-sample t-test (significance level  $\alpha = .05$ ) performed to evaluate, whether the mean results of asterric acid concentration (reported in fig. 5d) obtained for the standard cultivation medium (containing 20 g l<sup>-1</sup> of lactose and 2 g l<sup>-1</sup> of yeast extract) differed significantly from the mean values recorded for other tested media at a given time of the process (LAC, lactose; YR, yeast extract; NS, not significant)

| Cultivation time [h] | <i>P</i> values recorded for the tested growth media |                                                   |                                                     |                                                      |                                                     |                                                      |
|----------------------|------------------------------------------------------|---------------------------------------------------|-----------------------------------------------------|------------------------------------------------------|-----------------------------------------------------|------------------------------------------------------|
|                      | LAC 0.2 g l <sup>-1</sup><br>YE 2 g l <sup>-1</sup>  | LAC 2 g l <sup>-1</sup><br>YE 2 g l <sup>-1</sup> | LAC 200 g l <sup>-1</sup><br>YE 2 g l <sup>-1</sup> | LAC 20 g l <sup>-1</sup><br>YE 0.2 g l <sup>-1</sup> | LAC 20 g l <sup>-1</sup><br>YE 20 g l <sup>-1</sup> | LAC 20 g l <sup>-1</sup><br>YE 200 g l <sup>-1</sup> |
| 0                    | NS*                                                  | NS*                                               | NS*                                                 | NS*                                                  | NS*                                                 | NS*                                                  |
| 24                   | NS*                                                  | NS*                                               | NS*                                                 | NS*                                                  | NS*                                                 | NS*                                                  |
| 48                   | NS*                                                  | NS*                                               | NS*                                                 | NS*                                                  | NS*                                                 | NS*                                                  |
| 72                   | NS*                                                  | NS*                                               | NS*                                                 | NS*                                                  | NS*                                                 | NS*                                                  |
| 96                   | NS*                                                  | NS*                                               | NS*                                                 | NS*                                                  | NS*                                                 | NS*                                                  |
| 120                  | .004                                                 | .004                                              | NS*                                                 | .008                                                 | .004                                                | .004                                                 |
| 144                  | .002                                                 | .002                                              | .048                                                | NS*                                                  | .002                                                | .002                                                 |
| 168                  | <.001                                                | <.001                                             | .008                                                | NS*                                                  | <.001                                               | <.001                                                |

\**P* >.05

**Supplementary Table 9:** Results of two-sample t-test (significance level  $\alpha = .05$ ) performed to evaluate, whether the mean results of lactose concentration (reported in fig. 6a) obtained for the standard cultivation medium (containing 20 g l<sup>-1</sup> of lactose and 2 g l<sup>-1</sup> of yeast extract) differed significantly from the mean values recorded for other tested media at a given time of the process (LAC, lactose; YR, yeast extract; NS, not significant)

| Cultivation time [h] | <i>P</i> values recorded for the tested growth media |                                                   |                                                     |                                                      |                                                     |                                                      |
|----------------------|------------------------------------------------------|---------------------------------------------------|-----------------------------------------------------|------------------------------------------------------|-----------------------------------------------------|------------------------------------------------------|
|                      | LAC 0.2 g l <sup>-1</sup><br>YE 2 g l <sup>-1</sup>  | LAC 2 g l <sup>-1</sup><br>YE 2 g l <sup>-1</sup> | LAC 200 g l <sup>-1</sup><br>YE 2 g l <sup>-1</sup> | LAC 20 g l <sup>-1</sup><br>YE 0.2 g l <sup>-1</sup> | LAC 20 g l <sup>-1</sup><br>YE 20 g l <sup>-1</sup> | LAC 20 g l <sup>-1</sup><br>YE 200 g l <sup>-1</sup> |
| 0                    | <.001                                                | <.001                                             | <.001                                               | NS*                                                  | NS*                                                 | NS*                                                  |
| 24                   | <.001                                                | <.001                                             | <.001                                               | NS*                                                  | .026                                                | .008                                                 |
| 48                   | <.001                                                | <.001                                             | <.001                                               | .022                                                 | .049                                                | .001                                                 |
| 72                   | <.001                                                | <.001                                             | <.001                                               | .012                                                 | .022                                                | .006                                                 |
| 96                   | <.001                                                | <.001                                             | <.001                                               | <.001                                                | NS*                                                 | NS*                                                  |
| 120                  | <.001                                                | <.001                                             | <.001                                               | <.001                                                | .038                                                | NS*                                                  |
| 144                  | <.001                                                | <.001                                             | <.001                                               | <.001                                                | .023                                                | NS*                                                  |
| 168                  | .003                                                 | .003                                              | <.001                                               | <.001                                                | .004                                                | .032                                                 |

\**P* >.05

**Supplementary Table 10:** Results of two-sample t-test (significance level  $\alpha = .05$ ) performed to evaluate, whether the mean results of total nitrogen concentration (reported in fig. 6b) obtained for the standard cultivation medium (containing 20 g l<sup>-1</sup> of lactose and 2 g l<sup>-1</sup> of yeast extract) differed significantly from the mean values recorded for other tested media at a given time of the process (LAC, lactose; YR, yeast extract; NS, not significant)

| Cultivation time [h] | <i>P</i> values recorded for the tested growth media |                                                   |                                                     |                                                      |                                                     |                                                      |
|----------------------|------------------------------------------------------|---------------------------------------------------|-----------------------------------------------------|------------------------------------------------------|-----------------------------------------------------|------------------------------------------------------|
|                      | LAC 0.2 g l <sup>-1</sup><br>YE 2 g l <sup>-1</sup>  | LAC 2 g l <sup>-1</sup><br>YE 2 g l <sup>-1</sup> | LAC 200 g l <sup>-1</sup><br>YE 2 g l <sup>-1</sup> | LAC 20 g l <sup>-1</sup><br>YE 0.2 g l <sup>-1</sup> | LAC 20 g l <sup>-1</sup><br>YE 20 g l <sup>-1</sup> | LAC 20 g l <sup>-1</sup><br>YE 200 g l <sup>-1</sup> |
| 0                    | NS*                                                  | NS*                                               | NS*                                                 | <.001                                                | <.001                                               | <.001                                                |
| 24                   | NS*                                                  | NS*                                               | NS*                                                 | <.001                                                | <.001                                               | <.001                                                |
| 48                   | .006                                                 | .031                                              | NS*                                                 | .017                                                 | <.001                                               | <.001                                                |
| 72                   | <.001                                                | .002                                              | NS*                                                 | .025                                                 | <.001                                               | <.001                                                |
| 96                   | <.001                                                | <.001                                             | .029                                                | .014                                                 | <.001                                               | <.001                                                |
| 120                  | <.001                                                | <.001                                             | .011                                                | <.001                                                | <.001                                               | <.001                                                |
| 144                  | <.001                                                | .002                                              | NS*                                                 | .012                                                 | <.001                                               | <.001                                                |
| 168                  | <.001                                                | <.001                                             | NS*                                                 | <.001                                                | <.001                                               | <.001                                                |

\**P* >.05

**Supplementary Table 11:** Results of two-sample t-test (significance level  $\alpha = .05$ ) performed to evaluate, whether the mean results of biomass production (reported in fig. 7) obtained for the standard cultivation medium (containing 20 g l<sup>-1</sup> of lactose and 2 g l<sup>-1</sup> of yeast extract) differed significantly from the mean values recorded for other tested media at 168 h of the process (LAC, lactose; YR, yeast extract)

| Cultivation time [h] | <i>P</i> values recorded for the tested growth media |                                                   |                                                     |                                                      |                                                     |                                                      |
|----------------------|------------------------------------------------------|---------------------------------------------------|-----------------------------------------------------|------------------------------------------------------|-----------------------------------------------------|------------------------------------------------------|
|                      | LAC 0.2 g l <sup>-1</sup><br>YE 2 g l <sup>-1</sup>  | LAC 2 g l <sup>-1</sup><br>YE 2 g l <sup>-1</sup> | LAC 200 g l <sup>-1</sup><br>YE 2 g l <sup>-1</sup> | LAC 20 g l <sup>-1</sup><br>YE 0.2 g l <sup>-1</sup> | LAC 20 g l <sup>-1</sup><br>YE 20 g l <sup>-1</sup> | LAC 20 g l <sup>-1</sup><br>YE 200 g l <sup>-1</sup> |
| 168                  | <.001                                                | .003                                              | .017                                                | <.001                                                | .009                                                | .004                                                 |
